# Supplementary material for: Tricarbonylrhenium(i) complexes of highly symmetric hexaazatrinaphthylene ligands (HATN): structural, electrochemical and spectroscopic properties
Source: Royal Society of Chemistry journal article supplement (doi:10.1039/c0dt00780c), 2010-01-01
Supplement: c0dt00780c.pdf [file c0dt00780c.pdf]

Supplementary material (ESI) for Dalton Transactions  
This journal is © The Royal Society of Chemistry 2010

**Tricarbonylrhenium(I) complexes of highly symmetric  
hexaazatrinaphthlene ligands (HATN): structural, electrochemical and  
spectroscopic properties.**

Sayak Roy<sup>[a]</sup> and Clifford P. Kubiak<sup>[a]\*</sup>

*Chemistry and Biochemistry, University of California, San Diego, 9500 Gilman Drive,*

*Mail Code 0358, La Jolla, San Diego 92093-0358*

*Email: [ckubiak@ucsd.edu](mailto:ckubiak@ucsd.edu), [saroy@ucsd.edu](mailto:saroy@ucsd.edu)*

Figure S1. Intermolecular  $\pi$ - $\pi$  stacking in 1 in the unit cell.

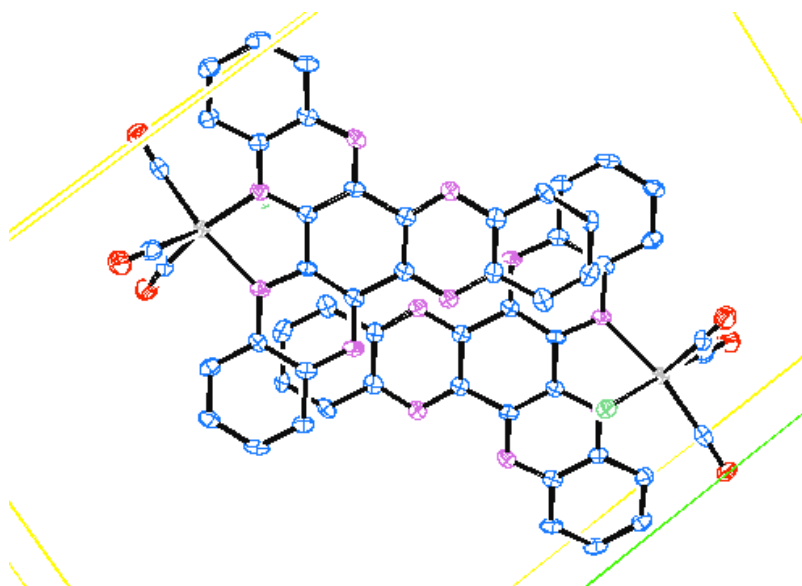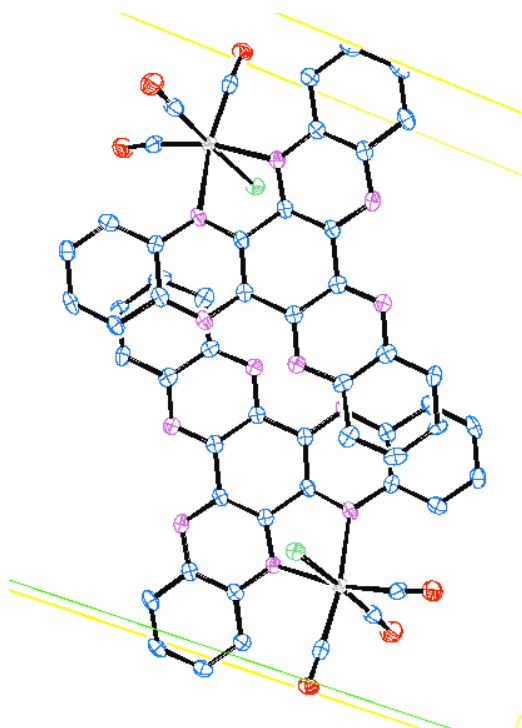

Figure S2. Solvent trapping in the unit cell by **2-Cl<sub>2</sub>**, Space filling and ellipsoid model shows trapped CHCl<sub>3</sub> molecules in a unit cell.

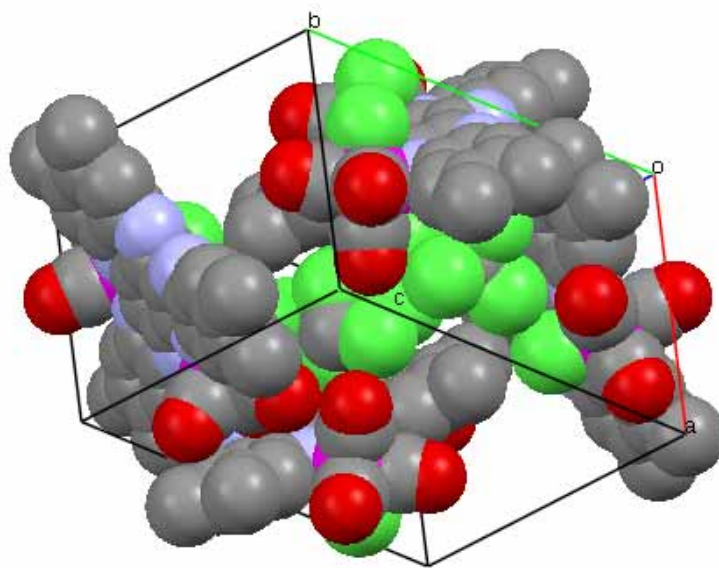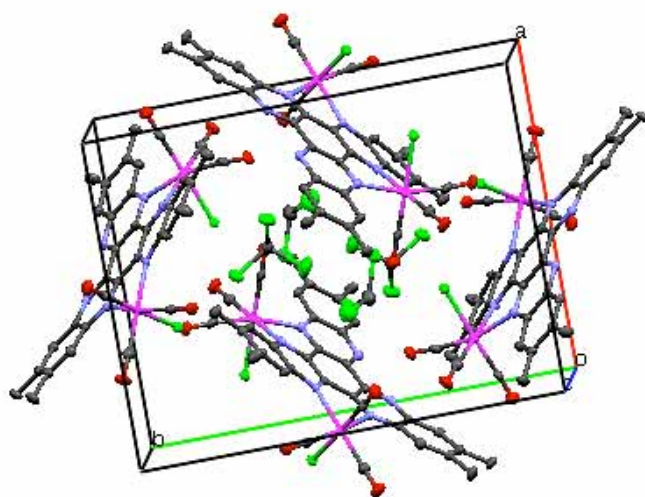

Figure S3. Computer simulation of the 1950  $\text{cm}^{-1}$  peak in the IR spectrum of **1-OTf**.

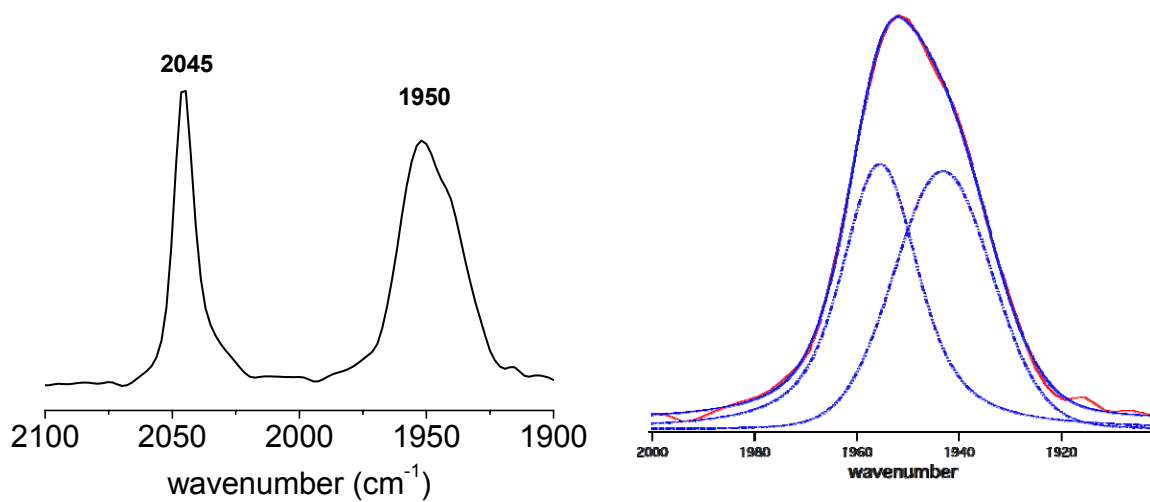

Figure S4. Computer simulation of the 1950  $\text{cm}^{-1}$  peak in the IR spectrum of **2**-OTf<sub>2</sub>.

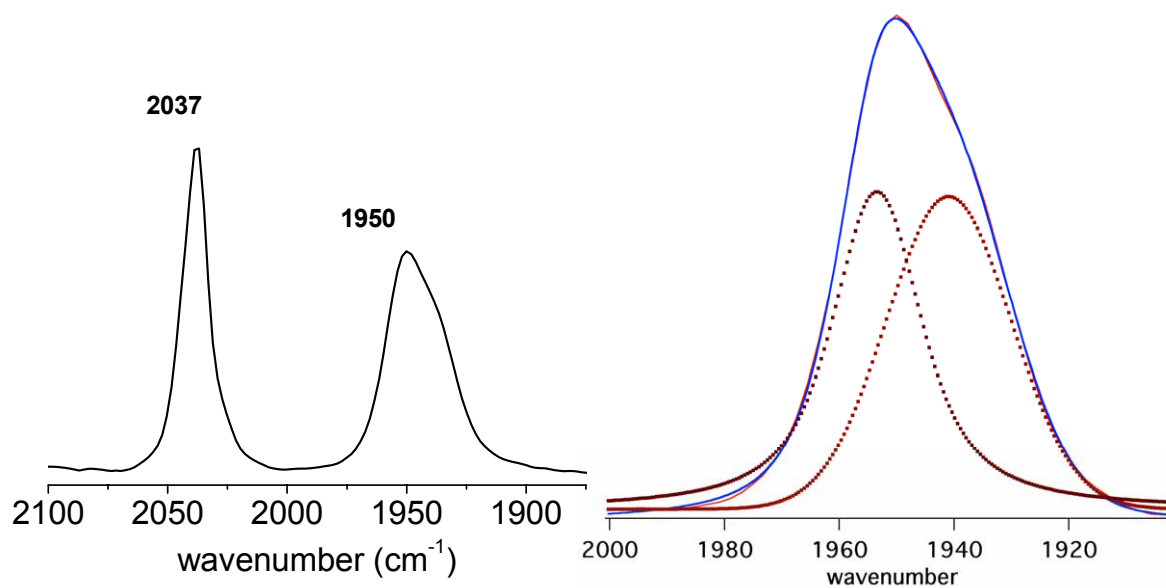

Figure S5: UV-vis spectrum of **1-Cl** (red) and **2-Cl<sub>2</sub>** (black) in CH<sub>2</sub>Cl<sub>2</sub>.

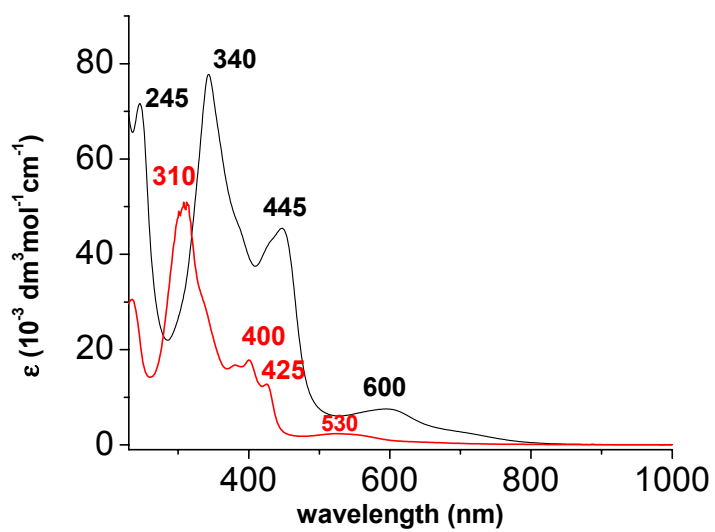

Figure S6: UV-vis spectrum of **1-OTf** (red) and **2-OTf<sub>2</sub>** (black) in CH<sub>3</sub>CN.

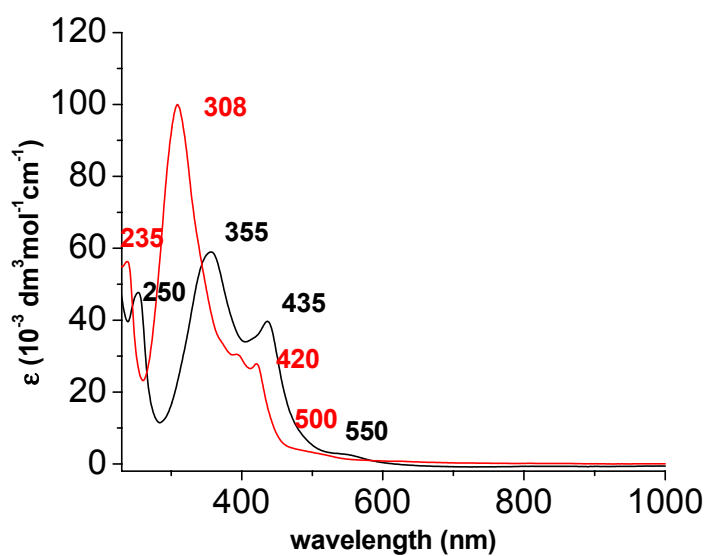

Figure S7: UV-vis-NIR spectra of **2-Cl<sub>2</sub>** (black) and **(2-Cl<sub>2</sub>)<sup>-</sup>** (red).

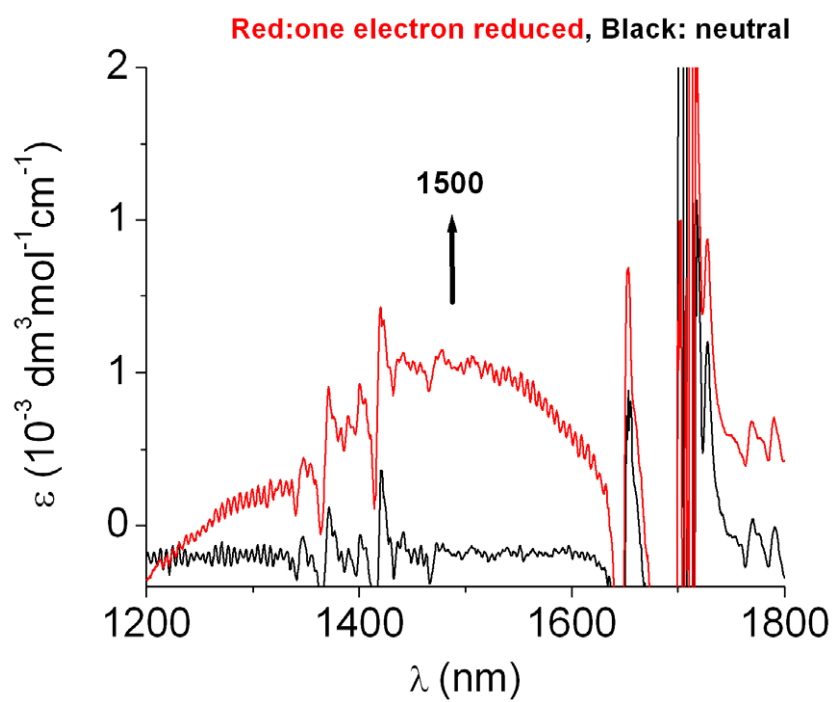



Figure S8: Cyclicvoltammogram of **1-OTf** (red) and **2-OTf<sub>2</sub>** (black) in 0.1 M Bu<sub>4</sub>NPF<sub>6</sub>/CH<sub>3</sub>CN at RT.

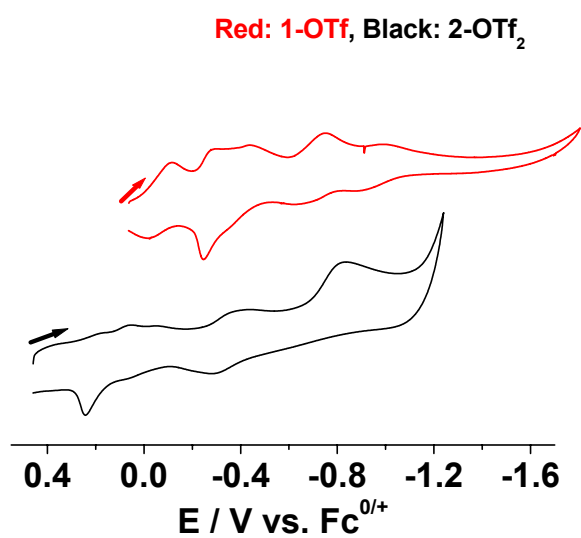

Figure S9: IR spectroelectrochemical reduction of **1-Cl** to **(1-Cl)<sup>-</sup>**.

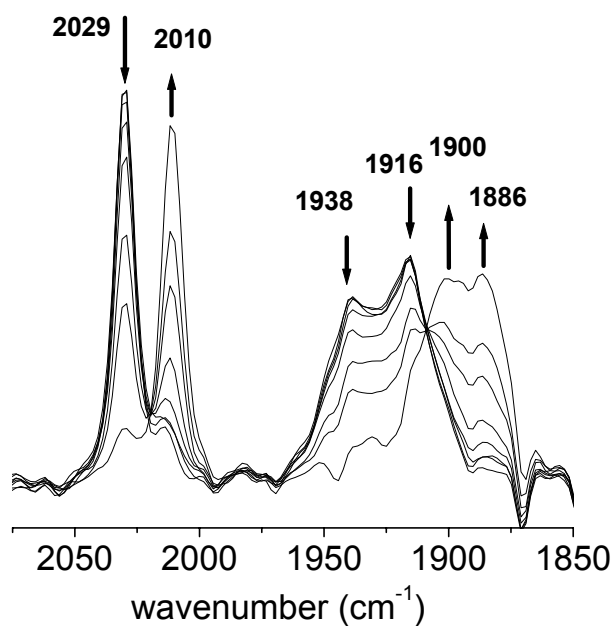

Figure S10: IR spectroelectrochemical reduction of **1**-OTf to **1**<sup>•-</sup> and **1**<sup>•-</sup> to **1**<sup>2-</sup>.

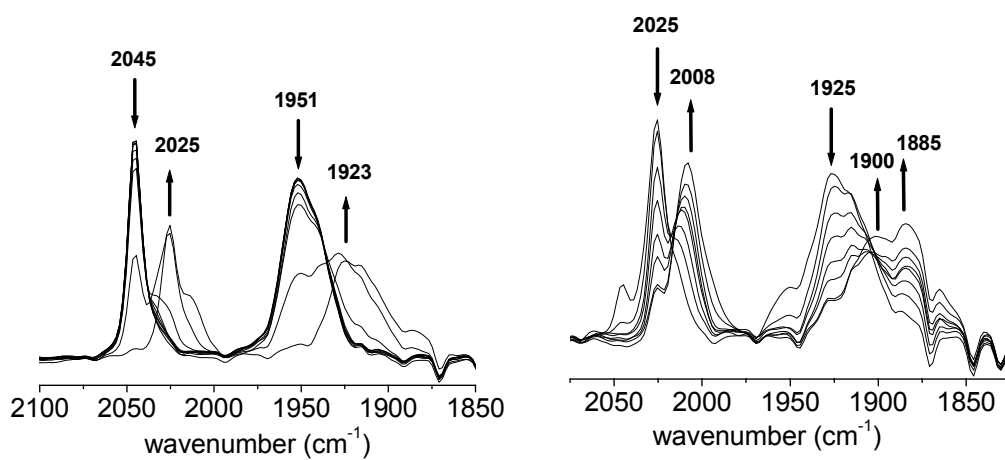

Figure S11: Spin density plot. HOMO of **2-Cl<sub>2</sub>** in neutral state and SOMO of (**2-Cl<sub>2</sub>**)<sup>•-</sup> after one electron reduction.

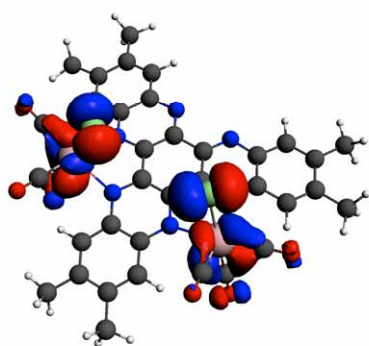

HOMO of **2-Cl<sub>2</sub>**

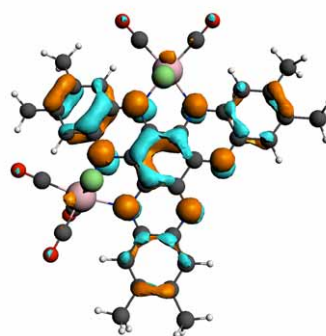

SOMO of (**2-Cl<sub>2</sub>**)<sup>•-</sup>

Table S1: Experimental and theoretical Bond lengths (Å).

| Complexes   | Bonds                   | Experimental bond lengths (Å) | Calculated bond lengths (Å) |
|-------------|-------------------------|-------------------------------|-----------------------------|
| <b>1-Cl</b> | Re-N1                   | 2.178(5)                      | 2.193                       |
|             | Re-N2                   | 2.188(5)                      | 2.196                       |
|             | Re-Cl1                  | 2.479(2)                      | 2.479                       |
|             | C1-O1                   | 1.136(8)                      | 1.160                       |
|             | C2-O2                   | 1.153(8)                      | 1.167                       |
|             | C3-O3                   | 1.139(8)                      | 1.160                       |
|             | <b>2-Cl<sub>2</sub></b> | Re1-N1                        | 2.200(3)                    |
| Re1-N2      |                         | 2.176(3)                      | 2.198                       |
| Re1-Cl2     |                         | 2.473(1)                      | 2.462                       |
| C1-O1       |                         | 1.147(6)                      | 1.160                       |
| C2-O2       |                         | 1.151(5)                      | 1.167                       |
| C3-O3       |                         | 1.146(5)                      | 1.162                       |
| Re2-N3      |                         | 2.174(4)                      | 2.200                       |
| Re2-N4      |                         | 2.199(3)                      | 2.208                       |
| C4-O4       |                         | 1.144(6)                      | 1.160                       |
| C5-O5       |                         | 1.150(6)                      | 1.167                       |
| C6-O6       |                         | 1.151(6)                      | 1.162                       |
| Re2-Cl1     |                         | 2.471(1)                      | 2.460                       |

Table S2: Experimental and theoretical bond angles (°).

| Complexes               | Angles     | Experimental bond angles (°) | Calculated bond angles (°) |
|-------------------------|------------|------------------------------|----------------------------|
| <b>1-Cl</b>             | N1-Re1-N2  | 74.1(2)                      | 74.52                      |
|                         | C1-Re1-C2  | 87.7(3)                      | 87.42                      |
|                         | C2-Re1-C14 | 88.4(2)                      | 87.82                      |
|                         | C1-Re1-C14 | 85.6(2)                      | 87.08                      |
|                         | C2-Re1-C3  | 91.6(3)                      | 90.89                      |
|                         | C1-Re1-C3  | 92.0(3)                      | 91.63                      |
|                         | N1-Re1-C3  | 97.1(2)                      | 97.08                      |
|                         | N2-Re1-C3  | 98.9(3)                      | 99.39                      |
|                         | C3-Re1-C14 | 177.6(2)                     | 177.91                     |
| <b>2-Cl<sub>2</sub></b> | N1-Re1-N2  | 75.52(12)                    | 74.85                      |
|                         | C3-Re1-C2  | 86.64(18)                    | 86.05                      |
|                         | C3-Re1-C1  | 91.64(19)                    | 91.98                      |
|                         | C2-Re1-C1  | 88.55(19)                    | 89.66                      |
|                         | C3-Re1-N2  | 95.58(15)                    | 97.43                      |
|                         | C2-Re1-N2  | 177.14(16)                   | 179.81                     |
|                         | C1-Re1-N2  | 93.18(16)                    | 94.85                      |
|                         | C2-Re1-N1  | 101.98(15)                   | 98.34                      |
|                         | C1-Re1-N1  | 98.89(16)                    | 98.94                      |
|                         | N3-Re2-N4  | 75.56(13)                    | 74.73                      |
|                         | C5-Re2-C4  | 95.37(19)                    | 91.23                      |
|                         | C5-Re2-C6  | 84.17(19)                    | 86.62                      |
|                         | C4-Re2-C6  | 87.49(19)                    | 88.52                      |
|                         | C5-Re2-N3  | 97.56(16)                    | 97.12                      |
|                         | C4-Re2-N3  | 94.91(16)                    | 94.39                      |
|                         | C4-Re2-N4  | 97.96(16)                    | 98.52                      |
| C6-Re2-N4               | 102.18(16) | 100.07                       |                            |
